# Supplementary material
Source: PubMed Central journal article supplement (PMC6644050)
Supplement: NIHMS1033196-supplement-Appendix_1.pdf [file NIHMS1033196-supplement-Appendix_1.pdf]

The following is a detailed description of the methods and results of the Rasch analysis.

## **Methods**

We examined data-model fit using information weighted (INFIT) and unweighted (OUTFIT) mean square values (MNSQ). INFIT and OUTFIT MNSQ are chi square statistics divided by their degrees of freedom and reported as ratios with an expected value of 1 and a range of 0 to infinity. These statistics provide an indication of the amount of useful information provided by an item. Values above 1 indicate more noise than expected by the model and values less than 1 indicate responses that are more deterministic than expected. Although there are no concrete rules about the acceptable thresholds for INFIT MNSQ and OUTFIT MNSQ, values between 0.5 and 1.5 are generally considered acceptable for use.<sup>12,13</sup> In addition, the Rasch reliability, an index of internal consistency similar to a Cronbach's alpha or KR-20, was determined.<sup>14,15</sup>

## **Results**

One additional question from the KOOS Sport/Recreation subscale and four questions from the KOOS Quality of Life subscales were identified due to the low correlations between the KOOS, JR and these items. More than 67% of patients had preoperative responses of "moderate" or worse to all four questions from the Quality of Life subscale, thus all four items met the threshold for inclusion. While 71% of patients reported at least moderate difficulty when responding to the Sport/Recreation question regarding twisting and pivoting, consistent with the methods of Lyman et al.,<sup>5</sup> this question was not added to the KOOS<sub>global</sub> as the KOOS, JR already included a question related to pain during this specific task. Pre- and postoperative KOOS<sub>global</sub>

scores were then calculated by combining the responses from the four Quality of Life questions with the seven KOOS<sub>JR</sub> questions. Similar to the scoring of the KOOS<sub>JR</sub>, the responses to the 11 KOOS<sub>global</sub> were summed to generate a raw score, and the raw score was then converted using a logit transformation (Table 1). The formula for converting raw to scaled scores was:

$$(-\text{Logit} + 6.1526) * 7.7701)$$

For the KOOS<sub>global</sub> score, the lowest possible raw score which would be indicative of no pain or dysfunction (0/44) was scaled to 100 and the highest possible raw score (44/44), which is indicative of extreme pain and dysfunction was scaled to 0.

Individual fit statistics for each item on the KOOS<sub>global</sub> are shown in Table 2. There were no items whose fit statistics exceeded previously established thresholds of .5 and 1.5. Overall, the data indicate sufficient fit to the model (Table 2). Person summary statistics for each instrument are shown in Table 3. Reliability, an index of internal consistency similar to a Cronbach's alpha or KR-20, was 0.89 for the KOOS<sub>global</sub>.

**Table 1. KOOS<sub>global</sub> raw scores to scaled scores conversion table.**

| Raw Score | Logit   | SE     | KOOS <sub>global</sub> | Raw Score | Logit  | SE     | KOOS <sub>global</sub> |
|-----------|---------|--------|------------------------|-----------|--------|--------|------------------------|
| 0         | -6.7173 | 1.885  | 100.000                | 23        | 0.184  | 0.3847 | 46.376                 |
| 1         | -5.3641 | 1.098  | 89.485                 | 24        | 0.3328 | 0.3868 | 45.220                 |
| 2         | -4.4776 | 0.8251 | 82.597                 | 25        | 0.4834 | 0.3895 | 44.049                 |
| 3         | -3.9035 | 0.7002 | 78.136                 | 26        | 0.6363 | 0.3927 | 42.861                 |
| 4         | -3.469  | 0.6224 | 74.760                 | 27        | 0.7919 | 0.3963 | 41.652                 |
| 5         | -3.1162 | 0.5683 | 72.019                 | 28        | 0.9504 | 0.4002 | 40.421                 |
| 6         | -2.8161 | 0.5291 | 69.687                 | 29        | 1.1123 | 0.4046 | 39.163                 |
| 7         | -2.5519 | 0.5001 | 67.634                 | 30        | 1.2779 | 0.4093 | 37.876                 |
| 8         | -2.3132 | 0.478  | 65.779                 | 31        | 1.4475 | 0.4145 | 36.558                 |
| 9         | -2.0934 | 0.4604 | 64.071                 | 32        | 1.6217 | 0.4202 | 35.205                 |
| 10        | -1.8883 | 0.4458 | 62.478                 | 33        | 1.8009 | 0.4268 | 33.812                 |
| 11        | -1.6952 | 0.4333 | 60.977                 | 34        | 1.9863 | 0.4344 | 32.372                 |
| 12        | -1.5121 | 0.4225 | 59.555                 | 35        | 2.1789 | 0.4436 | 30.875                 |
| 13        | -1.3377 | 0.4131 | 58.200                 | 36        | 2.3806 | 0.4551 | 29.308                 |
| 14        | -1.1704 | 0.4051 | 56.900                 | 37        | 2.5942 | 0.4699 | 27.648                 |
| 15        | -1.0091 | 0.3983 | 55.646                 | 38        | 2.824  | 0.4898 | 25.863                 |
| 16        | -0.8527 | 0.3928 | 54.431                 | 39        | 3.0769 | 0.5177 | 23.898                 |
| 17        | -0.7002 | 0.3886 | 53.246                 | 40        | 3.3654 | 0.5591 | 21.656                 |
| 18        | -0.5504 | 0.3855 | 52.082                 | 41        | 3.7129 | 0.6248 | 18.956                 |
| 19        | -0.4027 | 0.3835 | 50.935                 | 42        | 4.1729 | 0.743  | 15.382                 |
| 20        | -0.256  | 0.3825 | 49.795                 | 43        | 4.9159 | 1.0236 | 9.609                  |
| 21        | -0.1098 | 0.3824 | 48.659                 | 44        | 6.1525 | 1.8382 | 0.000                  |
| 22        | 0.0367  | 0.3832 | 47.520                 |           |        |        |                        |

**Table 2. Item Measures, Standard Errors, and Fit Statistics**

| Item | KOOS <sub>global</sub> |       |               |                |
|------|------------------------|-------|---------------|----------------|
|      | Measure                | SE    | INFIT<br>MNSQ | OUTFIT<br>MNSQ |
| S6   | .6902                  | .0266 | 1.08          | 1.18           |
| P2   | -.1286                 | .0226 | 1.19          | 1.15           |
| P3   | 1.0442                 | .0268 | 1.02          | 1.04           |
| P6   | .6170                  | .0257 | .97           | .99            |
| P9   | 1.5300                 | .0305 | .93           | .96            |
| A3   | 1.5666                 | .0294 | .87           | .90            |
| A5   | .7641                  | .0257 | .95           | .98            |
| Q1   | -2.4345                | .0220 | .94           | .93            |
| Q2   | -1.6873                | .0208 | 1.29          | 1.38           |
| Q3   | -1.2673                | .0211 | 1.06          | 1.01           |
| Q4   | -.6944                 | .0239 | .65           | .84            |

Measure is the mean item parameter calibration

S.E. is the mean standard error

INFIT MNSQ is an information weighted chi square statistic

OUTFIT MNSQ is an unweighted chi square statistic

**Table 3. Person Summary Statistics (n=2020)**

|                        | Measure | S.E.  | INFIT | OUTFIT | Rel. | Ext. (%)   |
|------------------------|---------|-------|-------|--------|------|------------|
|                        |         |       | MNSQ  | MNSQ   |      |            |
| KOOS <sub>global</sub> | -1.6853 | .5059 | 1.00  | 1.01   | .89  | 226 (5.6%) |

---

Measure is the mean item parameter calibration

S.E. is the mean standard error

INFIT MNSQ is an information weighted chi square statistic

OUTFIT MNSQ is an unweighted chi square statistic

Rel. is Rasch reliability

Ext. is the number and percentage of extreme scores

---

Three additional items were identified from the full version of the HOOS for potential inclusion in the HOOS<sub>global</sub>. Less than 33% of patients had preoperative responses of “none” to question S1: “Do you feel grinding, hear clicking or any other type of noise from your hip?”, question P1: “How often is your hip painful?”, and question Q1: “How often are you aware of your hip?” S1 had an INFIT of 2.61 and OUTFIT of 2.91; an extreme violation of the established thresholds of .5 and 1.5. After removing the item, reliability increased from 0.90 to 0.92, which further suggests that the item was introducing only noise and not information. The raw

HOOS<sub>global</sub> score was then determined by summing the responses to the original six HOOS, JR items and questions P1 and Q1. The scaled HOOS<sub>global</sub> score was determined using the logit conversion table (Table 1). The formula for converting raw to HOOS<sub>global</sub> scaled scores was:  $(- \text{Logit} + 8.5004) * 5.8621$ . The HOOS<sub>global</sub> questionnaire and scoring instructions can be found in the Supplemental Files available on the journal's website.

The Individual fit statistics for each item on both the HOOS JR and HOOS<sub>global</sub> are shown in Table 2. There was one item (A5) whose OUTFIT exceed the previously established thresholds of .5 and 1.5; however, its INFIT did not, meaning that response patterns to this item are less predictable for people with calibrations further away from the item calibration. Overall, the data indicate sufficient fit to the model (Table 2). Person summary statistics for each instrument are shown in Table 3. Rasch reliability was 0.88 for the HOOS, JR and 0.92 for the HOOS<sub>global</sub>.

**Table 1. Raw score to scaled score conversion chart for the HOOS<sub>global</sub>**

| Raw | Logit   | SE     | HOOS <sub>global</sub> | Raw | Logit  | SE     | HOOS <sub>global</sub> |
|-----|---------|--------|------------------------|-----|--------|--------|------------------------|
| 0   | -8.5583 | 1.9431 | 100.000                | 17  | 0.1401 | 0.5588 | 49.009                 |
| 1   | -7.0133 | 1.2371 | 90.943                 | 18  | 0.4554 | 0.5644 | 47.161                 |
| 2   | -5.7641 | 1.0218 | 83.620                 | 19  | 0.778  | 0.5719 | 45.269                 |
| 3   | -4.8853 | 0.8547 | 78.468                 | 20  | 1.1104 | 0.5816 | 43.321                 |
| 4   | -4.2593 | 0.7358 | 74.799                 | 21  | 1.4557 | 0.5942 | 41.297                 |
| 5   | -3.7727 | 0.6649 | 71.946                 | 22  | 1.8183 | 0.6109 | 39.171                 |
| 6   | -3.3605 | 0.6225 | 69.530                 | 23  | 2.2046 | 0.6333 | 36.907                 |
| 7   | -2.9904 | 0.5961 | 67.360                 | 24  | 2.6238 | 0.6625 | 34.449                 |
| 8   | -2.6459 | 0.5789 | 65.341                 | 25  | 3.0851 | 0.6961 | 31.745                 |
| 9   | -2.318  | 0.5672 | 63.419                 | 26  | 3.5923 | 0.7271 | 28.772                 |
| 10  | -2.0011 | 0.5593 | 61.561                 | 27  | 4.1387 | 0.7501 | 25.569                 |
| 11  | -1.6913 | 0.5542 | 59.745                 | 28  | 4.7181 | 0.7737 | 22.172                 |
| 12  | -1.3859 | 0.5514 | 57.954                 | 29  | 5.3466 | 0.8167 | 18.488                 |
| 13  | -1.0826 | 0.5503 | 56.177                 | 30  | 6.0799 | 0.9067 | 14.189                 |
| 14  | -0.7797 | 0.5506 | 54.401                 | 31  | 7.0879 | 1.1429 | 8.280                  |
| 15  | -0.4758 | 0.5521 | 52.619                 | 32  | 8.5004 | 1.9031 | 0.000                  |
| 16  | -0.1697 | 0.5547 | 50.825                 |     |        |        |                        |

**Table 2. Item Measures, Standard Errors, and Fit Statistics**

| Item | HOOS, JR |       |            |             | HOOS <sub>global</sub> |       |            |             |
|------|----------|-------|------------|-------------|------------------------|-------|------------|-------------|
|      | Measure  | S.E.  | INFIT MNSQ | OUTFIT MNSQ | Measure                | SE    | INFIT MNSQ | OUTFIT MNSQ |
| P5   | -.3478   | .0791 | .92        | .89         | .7025                  | .0769 | .93        | .96         |
| P10  | -1.2067  | .0775 | .94        | .93         | -.0882                 | .0745 | .86        | .87         |
| A3   | .1986    | .0975 | .85        | .90         | 1.2179                 | .0771 | .90        | 1.21        |
| A5   | .1528    | .0807 | 1.15       | 1.19        | 1.1689                 | .0782 | 1.21       | 1.76        |
| A12  | .5698    | .0797 | 1.09       | 1.11        | 1.5856                 | .0774 | 1.12       | 1.30        |
| A14  | .6332    | .0806 | 1.02       | .97         | 1.6367                 | .0783 | .98        | .96         |
| P1   | ---      | ---   | ---        | ---         | -2.7101                | .0723 | .84        | .90         |
| Q1   | ---      | ---   | ---        | ---         | -3.5134                | .0717 | 1.00       | 1.12        |

Measure is the mean item parameter calibration

S.E. is the mean standard error

INFIT MNSQ is an information weighted chi square statistic

OUTFIT MNSQ is an unweighted chi square statistic



**Table 3. Person Summary Statistics of the HOOS, JR and HOOS<sub>global</sub> (n=608)**

| Instrument             | Measure | S.E.  | INFIT | OUTFIT | Rel. | Ext. (%)    |
|------------------------|---------|-------|-------|--------|------|-------------|
|                        |         |       | MNSQ  | MNSQ   |      |             |
| HOOS, JR               | -2.1624 | .7427 | .99   | 1.00   | .88  | 128 (21.5%) |
| HOOS <sub>global</sub> | -1.7384 | .6823 | .97   | 1.09   | .92  | 52 (8.9%)   |

Measure is the mean item parameter calibration

S.E. is the mean standard error

INFIT MNSQ is an information weighted chi square statistic

OUTFIT MNSQ is an unweighted chi square statistic

Rel. is Rasch reliability

Ext. is the number and percentage of extreme scores
