# Supplementary material
Source: PubMed Central journal article supplement (PMC6644050)
Supplement: NIHMS1033196-supplement-Appendix_2.pdf [file NIHMS1033196-supplement-Appendix_2.pdf]

# KOOSglobal KNEE SURVEY

**INSTRUCTIONS:** This survey asks for your view about your knee. This information will help us keep track of how you feel about your knee and how well you are able to do your usual activities.

Answer every question by ticking the appropriate box, only one box for each question. If you are uncertain about how to answer a question, please give the best answer you can.

## Stiffness

The following question concerns the amount of joint stiffness you have experienced during the **last week** in your knee. Stiffness is a sensation of restriction or slowness in the ease with which you move your knee joint.

1. How severe is your knee stiffness after first wakening in the morning?\*

|                          |                          |                          |                          |                          |
|--------------------------|--------------------------|--------------------------|--------------------------|--------------------------|
| None                     | Mild                     | Moderate                 | Severe                   | Extreme                  |
| <input type="checkbox"/> |

## Pain

What amount of knee pain have you experienced the **last week** during the following activities?

2. Twisting/pivoting on your knee\*

|                          |                          |                          |                          |                          |
|--------------------------|--------------------------|--------------------------|--------------------------|--------------------------|
| None                     | Mild                     | Moderate                 | Severe                   | Extreme                  |
| <input type="checkbox"/> |

3. Straightening knee fully\*

|                          |                          |                          |                          |                          |
|--------------------------|--------------------------|--------------------------|--------------------------|--------------------------|
| None                     | Mild                     | Moderate                 | Severe                   | Extreme                  |
| <input type="checkbox"/> |

4. Going up or down stairs\*

|                          |                          |                          |                          |                          |
|--------------------------|--------------------------|--------------------------|--------------------------|--------------------------|
| None                     | Mild                     | Moderate                 | Severe                   | Extreme                  |
| <input type="checkbox"/> |

5. Standing upright\*

|                          |                          |                          |                          |                          |
|--------------------------|--------------------------|--------------------------|--------------------------|--------------------------|
| None                     | Mild                     | Moderate                 | Severe                   | Extreme                  |
| <input type="checkbox"/> |

## Function, daily living

The following questions concern your physical function. By this we mean your ability to move around and to look after yourself. For each of the following activities please indicate the degree of difficulty you have experienced in the **last week** due to your knee.

6. Rising from sitting\*

|                          |                          |                          |                          |                          |
|--------------------------|--------------------------|--------------------------|--------------------------|--------------------------|
| None                     | Mild                     | Moderate                 | Severe                   | Extreme                  |
| <input type="checkbox"/> |

7. Bending to floor/pick up an object\*

|                          |                          |                          |                          |                          |
|--------------------------|--------------------------|--------------------------|--------------------------|--------------------------|
| None                     | Mild                     | Moderate                 | Severe                   | Extreme                  |
| <input type="checkbox"/> |

## Quality of Life

8. How often are you aware of your knee problem?

Never

Monthly

Weekly

Daily

Constantly

9. Have you modified your life style to avoid potentially damaging activities to your knee?

Not at all

Mildly

Moderately

Severely

Totally

10. How much are you troubled with lack of confidence in your knee?

Not at all

Mildly

Moderately

Severely

Extremely

11. In general, how much difficulty do you have with your knee?

None

Mild

Moderate

Severe

Extreme

Thank you very much for completing all the questions in this questionnaire.

# KOOSglobal SCORING INSTRUCTIONS

The KOOSglobal was developed from the original versions of the Knee injury and Osteoarthritis Outcome Score (KOOS) and KOOS, JR surveys and contains 11 items from the original surveys. Items are coded from 0 to 4, none to extreme respectively.

KOOSglobal is scored by summing the raw response (range 0-44) and then converting it to an interval score using the table provided below. The interval score ranges from 0 to 100 where 0 represents complete knee disability and 100 represents perfect knee health.

Table for converting raw summed scores to interval scores from 0 (complete knee disability) to 100 (perfect knee health)

| <b>Raw summed score (0-44)</b> | <b>Interval score (0 to 100 scale)</b> | <b>Raw summed score (0-44)</b> | <b>Interval score (0 to 100 scale)</b> |
|--------------------------------|----------------------------------------|--------------------------------|----------------------------------------|
| 0                              | 100.000                                | 23                             | 46.376                                 |
| 1                              | 89.485                                 | 24                             | 45.220                                 |
| 2                              | 82.597                                 | 25                             | 44.049                                 |
| 3                              | 78.136                                 | 26                             | 42.861                                 |
| 4                              | 74.760                                 | 27                             | 41.652                                 |
| 5                              | 72.019                                 | 28                             | 40.421                                 |
| 6                              | 69.687                                 | 29                             | 39.163                                 |
| 7                              | 67.634                                 | 30                             | 37.876                                 |
| 8                              | 65.779                                 | 31                             | 36.558                                 |
| 9                              | 64.071                                 | 32                             | 35.205                                 |
| 10                             | 62.478                                 | 33                             | 33.812                                 |
| 11                             | 60.977                                 | 34                             | 32.372                                 |
| 12                             | 59.555                                 | 35                             | 30.875                                 |
| 13                             | 58.200                                 | 36                             | 29.308                                 |
| 14                             | 56.900                                 | 37                             | 27.648                                 |
| 15                             | 55.646                                 | 38                             | 25.683                                 |
| 16                             | 54.431                                 | 39                             | 23.898                                 |
| 17                             | 53.246                                 | 40                             | 21.656                                 |
| 18                             | 52.082                                 | 41                             | 18.956                                 |
| 19                             | 50.935                                 | 42                             | 15.382                                 |
| 20                             | 49.795                                 | 43                             | 9.609                                  |
| 21                             | 48.659                                 | 44                             | 0.000                                  |
| 22                             | 47.520                                 |                                |                                        |
